# Supplementary material for: State-of-the-art analytical methods of viral infections in human lung organoids
Source: PubMed Central journal article supplement (PMC9767351; doi:10.1371/journal.pone.0276115), 2022-12-20
Supplement: pone.0276115.s006.pdf [file pone.0276115.s006.pdf]

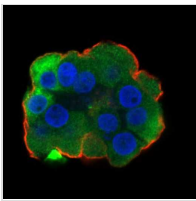

ceattaen ▾

# Fixation, Immunohistochemistry and in situ Hybridization of Human Lung Organoids

V.(ceattaen) +

In 1 collection

Morris Baumgardt<sup>1</sup>, Maren Hülsemann,<sup>2</sup> Katharina Hellwig<sup>1</sup>, Alina Langenhagen<sup>3</sup>, Anne Voss<sup>3</sup>, Simon Dökel<sup>3</sup>, Achim D. Gruber<sup>3</sup>, Stefan Hippenstiel<sup>1</sup>, Andreas C. Hocke<sup>1</sup>, Katja Hönzke<sup>1</sup>

<sup>1</sup>Charité – Universitätsmedizin Berlin, corporate member of Freie Universität Berlin and Humboldt Universität zu Berlin, Department of Infectious Diseases and Respiratory Medicine, Charitéplatz 1, 10117 Berlin, Germany.;

<sup>2</sup>Berlin Institute of Health at Charité (BIH), BIH QUEST Center for Responsible Research, Berlin, Germany;

<sup>3</sup>Department of Veterinary Pathology, Freie Universität Berlin, Berlin, Germany

1 Works for me

Reserved DOI:

10.17504/protocols.io.e6nvwk5p2vmk/v3

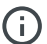

morris.baumgardt

## DISCLAIMER

Informed written consent was obtained from all volunteers and the study was approved by the Charité Ethics Committee (project 451, EA2/079/13).

## ABSTRACT

This protocol describes the fixation of infected human alveolar-like organoids, as well as the sample preparation for immunohistochemistry and immunohistology of infected tissue from alveolar-like organoids.

## PROTOCOL INFO

Morris Baumgardt, Maren Hülsemann,, Katharina Hellwig, Alina Langenhagen, Anne Voss, Simon Dökel, Achim D. Gruber, Stefan Hippenstiel, Andreas C. Hocke, Katja Hönzke . Fixation, Immunohistochemistry and in situ Hybridization of Human Lung Organoids . **protocols.io**  
<https://protocols.io/view/fixation-immunohistochemistry-and-in-situ-hybridiz-ceattaen>  
 Version created by [morris.baumgardt](#)

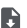

## COLLECTIONS ⓘ

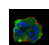

**Collection: State-of-the-Art Analytical Methods of Viral Infections in Human Lung Organoids**

#### KEYWORDS

immunohistochemistry, human lung organoids, fixation of organoids, in situ hybridization

#### CREATED

Jul 26, 2022

#### LAST MODIFIED

Sep 27, 2022

#### PROTOCOL INTEGER ID

67635

#### PARENT PROTOCOLS

Part of collection

[Collection: State-of-the-Art Analytical Methods of Viral Infections in Human Lung Organoids](#)

#### GUIDELINES

This protocol describes the processing of human alveolar-like organoids which have been grown according to Youk et al., 2020. <https://doi.org/10.1016/j.stem.2020.10.004>.

#### MATERIALS TEXT

| A                 | B          | C            | D             |
|-------------------|------------|--------------|---------------|
| Substance         | Company    | Order number | Concentration |
| GlutaMax 100x     | invitrogen | 35050-038    | 5 mL/500 mL   |
| Hepes             | invitrogen | 15630-056    | 5 mL/500 mL   |
| Advanced DMEM/F12 | invitrogen | 12634-034    | 1x            |

#### Composition of base medium

| A                                          | B             | C            |
|--------------------------------------------|---------------|--------------|
| Substance                                  | Company       | Order number |
| Formaldehyde solution 4%, buffered, pH 6.9 | Sigma Aldrich | 1004965000   |
| Roticlear                                  | Carl Roth     | A538.5       |

#### Materials for organoid fixation

#### Bufers, assays and special equipment used:

##### 10 mM TRIS + 1 mM EDTA buffer pH 9.0

1.2 g TRIS (1 M = 121.14 g/L)

0.29 g EDTA (1 M = 292.2 g/L)

-> Ø 1 L Aqua bidest (store at RT)

### Dilution medium for IF

50 mL PBS 0.01 M

0.5 g BSA

2 drops Tween 20

-> Store at 4°C

### 0.01 M PBS

0.9 g NaH<sub>2</sub>PO<sub>4</sub>

7.75 g Na<sub>2</sub>HPO<sub>4</sub>

43.6 g NaCl

-> 5 L Aqua bidest (store at RT)

| A                                        | B                 | C                 |
|------------------------------------------|-------------------|-------------------|
| Description                              | Company           | Order number      |
| Tissue-Tek VIP                           | Sakura            |                   |
| Modular Tissue Embedding Center EC 350-2 | Myr               |                   |
| Epredia HM 325 Rotary Microtome          | fisher scientific | 15340735          |
| COP 30 Cooling plate                     | VWR               | 632-7014          |
| Robotic coverslipper CV5030              | Leica             | 14 0478 80100     |
| StarFrost® Adhesive Slides               | VWR               | KNITVS11371077FKA |
| Ethanol denatured with 2 % isopropyl     | Berkel            |                   |
| Xylene technical grade                   | Th. Geyer         | 399-5L-PE         |
| Hemalum solution acid acc. to Mayer      | Roth              | T865.1            |
| Waldeck, Eosin 2 %                       | Biosystems        | 84-0023-00        |

### Devices/materials for embedding, sectioning and HE staining

| A                                                                                    | B                       | C            | D          |
|--------------------------------------------------------------------------------------|-------------------------|--------------|------------|
| Substance                                                                            | Company                 | Order number | RRID       |
| Formaldehyde solution 4%, buffered, pH 6.9                                           | Sigma Aldrich           | 1004965000   |            |
| goat-anti-ACE2, 1:100 IF                                                             | R&D                     | AF933        | AB_355722  |
| donkey anti-Goat IgG (H+L) Cross-Adsorbed Secondary Antibody, Alexa Fluor 488 1:2000 | Thermo Fisher           | A-11055      | AB_2534102 |
| FluoTag®-Q anti-SARS-CoV-2 Nucleocapsid, Sulfo-Cyanine 3 1:100                       | NanoTag Biotechnologies | N3601-SC3-L  |            |
| DAPI 4',6-Diamidino-2'-phenylindole dihydrochloride 1:100                            | Roche Diagnostics       | 10236276001  |            |

**Materials and antibodies for immunohistology used for host factor and virus detection**

| A                                                                                                       | B                              | C            |
|---------------------------------------------------------------------------------------------------------|--------------------------------|--------------|
| Substance                                                                                               | Company                        | Order number |
| Xylen                                                                                                   | Chemsolute                     | 371.500      |
| Ethanol                                                                                                 | Roth                           | 9065.4       |
| Fluoromount with DAPI                                                                                   | Roth                           | HP20.1       |
| ViewRNA ISH Tissue Kit (contains protease, probe diluent, amplifier mix, fast red, washing buffer etc ) | Invitrogen (Thermo Fisher Sci) | 19931        |
| CoV2 Probe                                                                                              | Invitrogen (Thermo Fisher Sci) | VPNKRHM      |
| EF1a Probe                                                                                              | Invitrogen (Thermo Fisher Sci) | VA1-10418-VT |
| dapB Probe                                                                                              | Invitrogen (Thermo Fisher Sci) | VF1-11712-VT |

**Materials and antibodies for immunohistochemistry (RNAview)**

| A                                          | B              | C            |
|--------------------------------------------|----------------|--------------|
| Substance                                  | Company        | Order number |
| ACE2 Probe                                 | ACD biotechnie | 848151-C2    |
| RNAscope® 3-plex Positive Control Probe-Hs | ACD biotechnie | 320861       |
| RNAscope® 3-plex Negative Control Probe    | ACD biotechnie | 320871       |

**Antibodies for immunohistochemistry (RNAscope)**

| A                                                              | B                 | C            |
|----------------------------------------------------------------|-------------------|--------------|
| Device                                                         | Company           | Order number |
| Fisherbrand™ Isotemp™ General Purpose Heating and Drying Ovens | fisher scientific | 15-103-0503  |
| Staining cuvette                                               | Roth              | 2287.1       |
| Magnetic Stirrer with heater                                   | neolab            | D-6010       |
| Waterproof thermometer                                         | VWR               | TD 131       |
| Ultra-accurate probes                                          | VWR               | PTZ 341      |

**Additional material used for immunohistochemistry (RNAscope)**

DISCLAIMER:

Informed written consent was obtained from all volunteers and the study was approved by the Charité Ethics Committee (project 451, EA2/079/13).

Fixation 25m

- 1 Remove the organoid medium from the organoid containing well. Organoids should be collected from minimum two wells of a 24-well plate, to obtain a sufficient amount of organoids for staining.
- 2 Add  1 mL cold base medium and collect Cultrex with organoids in a tube, flush well with  1 mL base medium.

- 3 Place tubes with organoids at **4 °C** for **00:05:00** (to dissolve Cultrex). 5m
  
- 4 Centrifuge for **300 x g, 4°C, 00:05:00** . 5m
  
- 5 Remove supernatant, add 4% Formaldehyde solution (FA) and pipette up and down.
  
- 6   
Store over night at **4 °C** in the BSL3 lab.
  
- 7 Export vessel from the BSL3 with organoid and FA, centrifuge for **300 x g, 4°C, 00:05:00** 5m  
remove FA and add fresh 4% FA.
  
- 8 Store over night at **4 °C** .
  
- 9 Centrifuge for **300 x g, 00:05:00** and remove FA. 5m
  
- 10 Resolve pellet in PBS and store at **4 °C** or proceed with embedding.
  
- 11 Centrifuge for **300 x g, 00:05:00** and remove PBS. 5m
  
- 12 Resolve pellet in **100 µL** tissue Tek embedding medium (Histogel), pipette a drop on parafilm, place on ice and upon solidification place in the embedding cassette (act fast).
  
- 13 Close cassette, store in PBS, proceed with paraffin embedding and sectioning (sections: 2 µm).

14 Put cassette into the automatic embedding machine and start the following program:

| A    | B        | C                 | D                  | E                | F   | G    |
|------|----------|-------------------|--------------------|------------------|-----|------|
| Step | Solution | Concentration (%) | Duration (min:sec) | Temperature (°C) | D/V | Mix  |
| 1    | Formalin | 4                 | 0:00               | –                | ON  | OFF  |
| 2    | Water    |                   | 0:30               | 40               | ON  | OFF  |
| 3    | Alcohol  | 70                | 1:00               | 40               | ON  | Slow |
| 4    | Alcohol  | 80                | 1:00               | 40               | ON  | Slow |
| 5    | Alcohol  | 96                | 1:00               | 40               | ON  | Slow |
| 6    | Alcohol  | 96                | 1:00               | 40               | ON  | Slow |
| 7    | Alcohol  | 100               | 1:00               | 40               | ON  | Slow |
| 8    | Alcohol  | 100               | 1:00               | 40               | ON  | Slow |
| 9    | Xylene   |                   | 1:00               | 40               | ON  | Slow |
| 10   | Xylene   |                   | 1:00               | 40               | ON  | Slow |
| 11   | Paraffin |                   | 1:00               | 60               | ON  | OFF  |
| 12   | Paraffin |                   | 1:00               | 60               | ON  | OFF  |
| 13   | Paraffin |                   | 1:00               | 60               | ON  | OFF  |
| 14   | Paraffin |                   | 1:00               | 60               | ON  | OFF  |

**Tissue-Tek VIP embedding program**

15 In the following, after embedding, the samples are sectioned and mounted on adhesive slides. Sections of 2 µm each are prepared. Sections 1,5,9,13 are stained HE (following table) to see in which stages organoids are present, the rest is kept as blank section.

| A    | B            | C                  |
|------|--------------|--------------------|
| Step | Solution     | Duration (min:sec) |
| 1    | Xylene       | 2x 2:00            |
| 2    | Xylene       | 1x 3:00            |
| 3    | 96% ethanol  | 0:30               |
| 4    | 80% ethanol  | 0:30               |
| 5    | 70% ethanol  | 0:30               |
| 6    | Water        | 1:00               |
| 7    | Hematoxylin  | 8:00               |
| 8    | Water        | 0:05               |
| 9    | 70% ethanol  | 0:10               |
| 10   | 80% ethanol  | 0:30               |
| 11   | 96% ethanol  | 0:45               |
| 12   | 100% ethanol | 1:00               |
| 13   | 100% ethanol | 1:00               |
| 14   | Xylene       | 4x 1:00            |

#### HE staining steps

Immunohistology staining 3h 26m

16 

Dewaxing over night at **60 °C** in Roticlear.

17 Put the slide with organoids three times for **00:15:00** in Roticlear at **60 °C** (use fresh Roticlear for every step). 15m

18 **00:15:00** 100% Ethanol. 15m

19 **00:01:00** 100% Ethanol. 1m

20 **00:10:00** 96% Ethanol. 10m

21 **00:05:00** 80% Ethanol. 5m



- 22  **00:05:00** 70% Ethanol. 5m
- 23  **00:05:00** 50% Ethanol. 5m
- 24 Shake 3x  **00:05:00** in **[M]0.01 Molarity (M)** PBS (100 U/min). 5m
- 25 Antigen-Retrival for  **00:30:00** in a steam bath: Tris-EDTA buffer. 30m
- 26 Let cool down for approx.  **00:30:00** . 30m
- 27 Shake 3x  **00:05:00** in **[M]0.01 Molarity (M)** PBS (100 U/min). 5m
- 28  **00:15:00** permeabilisation in 1% Triton (in **[M]0.01 Molarity (M)** PBS) (on shaker 100 U/min). 15m
- 29 Shake 3x  **00:05:00** in **[M]0.01 Molarity (M)** PBS (100 U/min). 5m
- 30 Blocking for  **00:30:00** in 5% appropriate serum (in dilution medium), ca.  **70 µL** per tissue slice. 30m
- 31 Flush carefully with **[M]0.01 Molarity (M)** PBS (Pasteur pipette).
- 32 Dilute primary antibody in dilution medium and incubate over night at **4 °C** (wet chamber).

- 33 Flush carefully with [M]0.01 Molarity (M) PBS (Pasteur pipette).
- 34 Shake 3x ⌚00:05:00 in [M]0.01 Molarity (M) PBS (100 U/min). 5m
- 35 Dilute secondary antibody in dilution medium and incubate over night at ⚡ 4 °C (wet chamber).
- 36 Flush carefully with [M]0.01 Molarity (M) PBS (Pasteur pipette).
- 37 Shake 3x ⌚00:05:00 in [M]0.01 Molarity (M) PBS (100 U/min). 5m
- 38 Incubate ⌚00:05:00 with DAPI. 5m
- 39 Shake 3x ⌚00:05:00 in [M]0.01 Molarity (M) PBS (100 U/min). 5m
- 40 Embedding with Mowiol® and coverslip, let air dry for ⌚00:10:00 and seal edges with nail<sup>10m</sup> polish.
- 41 Immunofluorescence is analyzed by spectral confocal microscopy using a LSM 780 [Carl-Zeiss, Jena, Germany]. Based on a spectral image lambda stack, linear unmixing of tissue autofluorescence and overlapping spectra of fluorochromes is performed using ZEN 2012 software (Carl-Zeiss, Jena, Germany). To reveal lung and cell morphology, images are combined with Differential Interference Contrast (DIC). All image sets are acquired using optimal configuration regarding resolution and signal to noise ratio. Images are processed using ZEN 2012.

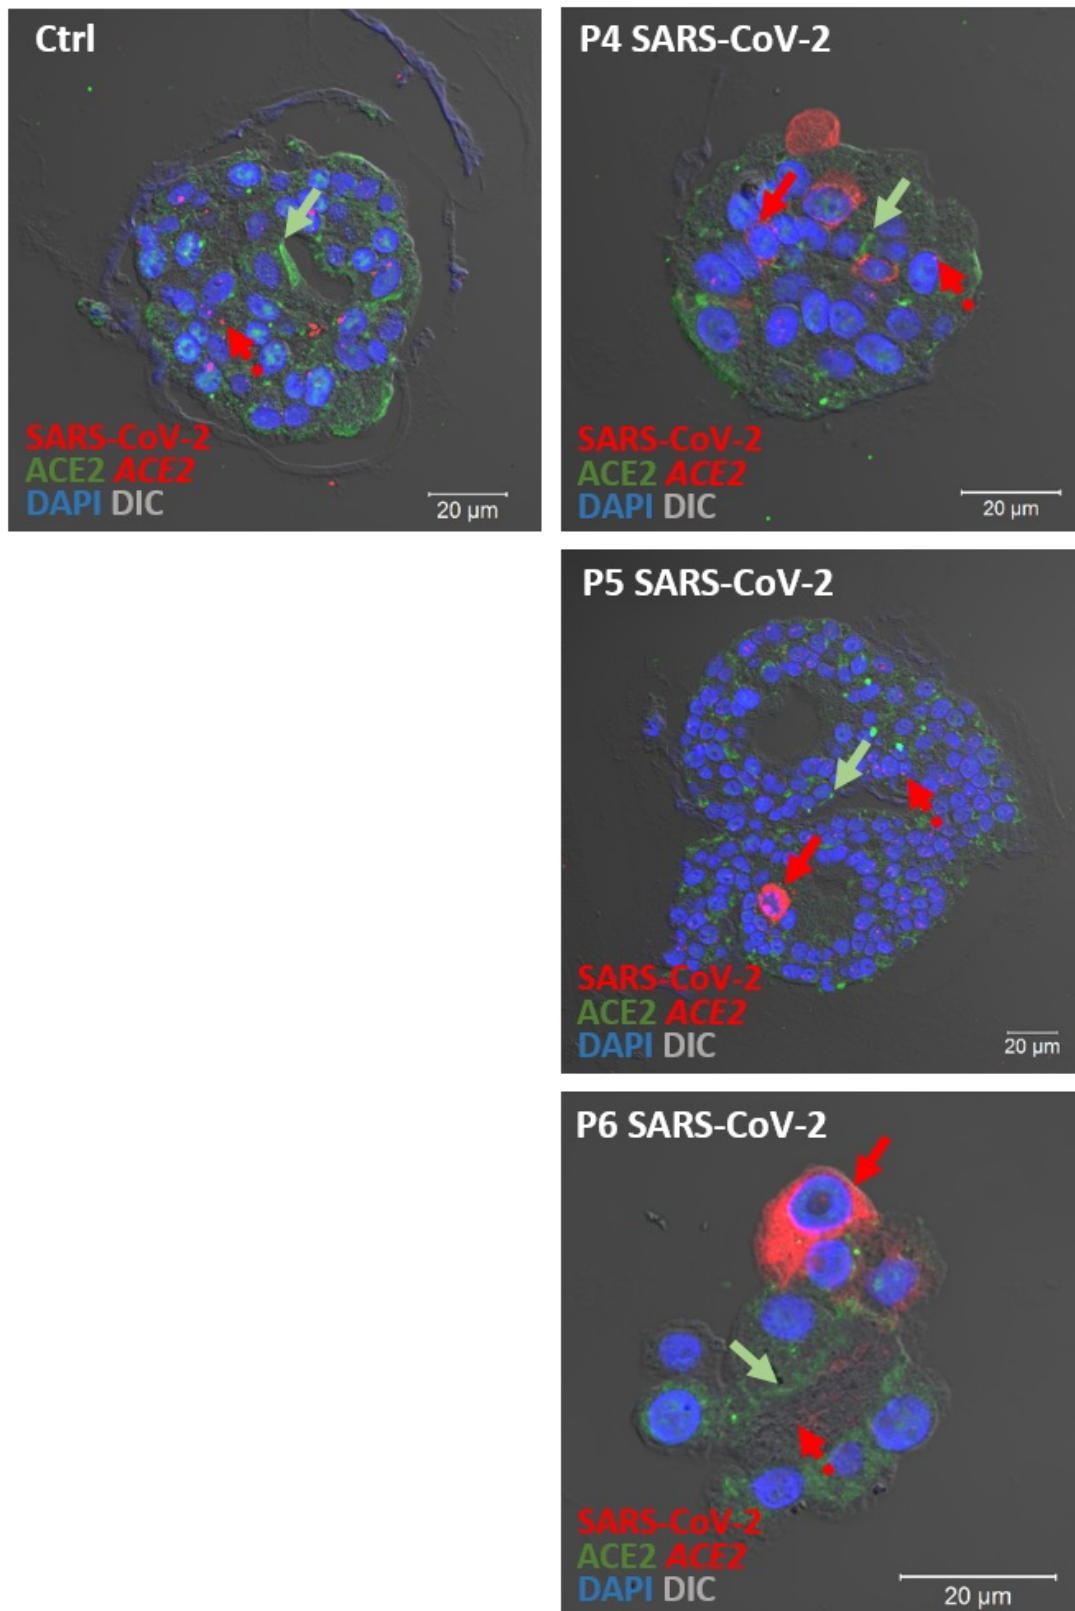

Representative immunostainings for exemplary mock- (left panel) and SARS-CoV-2-infected (right column) human alveolar-like organoids. Shown are immunostainings for SARS-CoV-2 (N-protein, red), ACE2 (green) and *ACE2* mRNA expression (red dots, see *in situ* hybridization - step 55) 24 h post infection (MOI = 1). Arrows indicate either cells positive for SARS-CoV-2 (red arrows) or areas of particularly high ACE2 expression (protein: green arrows, mRNA: red dotted arrows). Cell nuclei are visualized by DAPI stain (blue). Scale bars = 20 μm.

42 We used a maximum of 12 slides at a time for the procedure. The size of the FFPE section should not exceed 2/3 of the slide and at least 5 mm away from each slide boarder.

43 Baking:

43.1 Bake the slides for 🕒 **01:00:00** at 🌡 **60 °C +-1°C** in a dry oven. 1h

43.2 Direct after baking remove paraffin with a tissue as much as you can, but do not touch the tissue.

44 Deparaffinization:

44.1 Pour 🧴 **200 mL** of xylene into a staining dish.

44.2 Transfer the baked slides to the staining dish and incubate the slides at room <sup>5m</sup> temperature for 🕒 **00:05:00** . Agitate frequently by moving the rack up and down.

44.3 Repeat the xylene washing with fresh xylene for 2 times.

44.4 Remove the slides from the xylene and wash the slides twice with 🧴 **200 mL** <sup>5m</sup> of 100% ethanol for 🕒 **00:05:00** with frequent agitation.

44.5 Remove the slides from the ethanol and place them face up on a paper towel to <sup>5m</sup> air dry for 🕒 **00:05:00** at room temperature.

45 Hydrophobic barrier:

- 45.1 Before using the hydrophobic barrier pen dap it on a paper towel several times to ensure proper flow of the hydrophobic solution.
- 45.2 To create a hydrophobic barrier draw a rectangle around the organoid section, repeat it 2-4 times to ensure a solid seal.
- 45.3 Let the barrier dry for ~ 🕒00:25:00 (until it is really dry). 25m

## 46 Heat Pretreatment:

- 46.1 Heat the 1x Pretreatment Solution to 🔥 90 °C to 95°C in a porcelain staining jar (do not boil the Solution).
- 46.2 Incubate the slides for 🕒00:10:00 at 🔥 90 °C to 95°C in the 1x Pretreatment Solution (time depends on tissue sample). 10m
- 46.3 Remove the slide from the jar and submerge it directly into a clear staining dish containing 📏200 mL of full desalted autoclaved water (VE water), at this point the slides should not dry out.
- 46.4 Wash for 🕒00:01:00 with frequent agitation. 1m
- 46.5 Repeat the wash step 46.3 and 46.4 one more time with 📏200 mL of fresh VE water.
- 46.6 Transfer the slides to a clear staining dish containing [M]0.01 Molarity (M) PBS.

## 47 Protease digestion and fixation:

- 47.1 Dilute the Protease (all in ViewRNA Tissue Kit) 1:100 in pre warmed 1X PBS (  $\delta$  40 °C ) and briefly vortex to mix.
- 47.2 Remove each slide out of the dish and flick it to remove excess PBS. Do not let the slides dry out.
- 47.3 Place each slide face up on an object carrier box (OCB; pre tempered to  $\delta$  40 °C / pre wetted with VE water) and immediately add  $\square$ 200  $\mu$ L of the working protease solution onto the tissue section. Make sure that the tissue section is covered with working protease solution.
- 47.4 Incubate the OCB in an isotemp oven (Thermo Fisher) at  $\delta$  40 °C for 20m  $\odot$ 00:20:00 (Time depends on organoid sample).
- 47.5 After incubation decant the working protease solution from the slides and wash<sup>1m</sup> the slides two times with PBS in a staining dish for  $\odot$ 00:01:00 .
- 47.6 Remove each slide out of the dish and flick it to remove excess PBS. Do not let the slides dry out.
- 47.7 Place each slide on a paper towel under a fume hood and incubate with 4% PFA<sup>5m</sup> for  $\odot$ 00:05:00 at room temperature.
- 47.8 After incubation decant the PFA from the slides and wash the slides two times<sup>1m</sup> with PBS in a staining dish for  $\odot$ 00:01:00 .

## 48 Hybridization:

- 48.1 Dilute the viewRNA probe set 1:40 in pre warmed probe set diluent and briefly vortex to mix. For positive control we use a *EF1 $\alpha$*  probe set (also possible is *ACTB* or *GAPDH*) and for negative control we use a *DapB* probe set.
- 48.2 Remove each slide out of the dish and flick it to remove excess PBS. Do not let the slides dry out.

- 48.3 Place each slide face up on an OCB and immediately add **200 µL** of the diluted probe set solution onto the tissue section. Make sure that the tissue section is covered with solution.
- 48.4 Incubate the OCB in an isotemp oven at **40 °C** for **02:00:00**. 2h
- 48.5 Prepare **2 L** wash buffer with VE water, **18 mL** wash comp1 and **5 mL** wash comp2.
- 48.6 After incubation decant the probe set solution and wash the slides in a staining<sup>2m</sup> dish with wash buffer for **00:02:00**. Repeat washing for 2 times more with fresh washing buffer.
- 48.7 Optionally the slides can be stored at this point in **200 mL** storage buffer<sup>1d</sup> (**60 mL** comp2 and **140 mL** VE water) for **24:00:00** at RT.
- 48.8 After storage the slides must be washed again 3 times with wash buffer.

## 49 Pre amplifier hybridization:

- 49.1 Pre warm the pre amplifier mix and swirl it to mix the solution.
- 49.2 Remove each slide out of the dish and flick it to remove excess liquid. Do not let the slides dry out.
- 49.3 Place each slide face up on an OCB and immediately add **200 µL** of the pre amplifier mix onto the tissue section. Make sure that the tissue section is covered with solution.
- 49.4 Incubate the OCB in an isotemp oven at **40 °C** for **00:25:00**. 25m

49.5 After incubation decant the pre amplifier mix and wash the slides in a staining<sup>2m</sup> dish with wash buffer for 🕒00:02:00 . Repeat washing for 2 times more with fresh washing buffer.

## 50 Amplifier hybridization:

50.1 Pre warm the amplifier mix and swirl it to mix the solution.

50.2 Remove each slide out of the dish and flick it to remove excess liquid. Do not let the slides dry out.

50.3 Place each slide face up on an OCB and immediately add 📄200 µL of the amplifier mix onto the tissue section. Make sure that the tissue section is covered with solution.

50.4 Incubate the OCB in an isotemp oven at 🌡40 °C for 🕒00:15:00 15m

50.5 After incubation decant the amplifier mix and wash the slides in a staining<sup>2m</sup> dish with wash buffer for 🕒00:02:00 . Repeat washing for 2 times more with fresh washing buffer.

## 51 Label Probe 1-AP hybridization:

51.1 After incubation decant the amplifier mix and wash the slides in a staining<sup>2m</sup> dish with wash buffer for 🕒00:02:00 .

51.2 Repeat washing for 2 times more with fresh washing buffer.



- 51.3 Remove each slide out of the dish and flick it to remove excess liquid. Do not let the slides dry out.
- 51.4 Place each slide face up on an OCB and immediately add **200 µL** of the label probe 1-AP solution onto the tissue section. Make sure that the tissue section is covered with solution.
- 51.5 Incubate the OCB in an isotemp oven at **40 °C** for **00:15:00**. 15m
- 51.6 After incubation decant the amplifier mix and wash the slides in a staining dish<sup>3m</sup> with wash buffer for **00:03:00**.
- 51.7 Repeat washing for 2 times more with fresh washing buffer.

## 52 Fast Red Substrate:

- 52.1 Remove the slides from the dish and place them face up on a paper towel, 5m immediately add **200 µL** of the AP Enhancer Solution to each slide and incubate for **00:05:00**.
- 52.2 Decant the AP Enhancer Solution after incubation, place each slide face up on an OCB and add directly **200 µL** of fresh prepared fast red mix (for **2.5 mL** fast red buffer add **40 µL** fast red substrate1, vortex then add **40 µL** substrate2, vortex at least add **40 µL** substrate3, vortex).
- 52.3 Incubate the OCB at RT in the dark for **01:00:00**. 1h
- 52.4 After incubation decant the fast red mix and wash the slides in a staining dish<sup>1m</sup> with PBS for **00:01:00**.
- 52.5 Repeat washing for one time more with fresh PBS.

## 53 Counter staining:

53.1 Optionally counter stain for  00:00:45 with Gill's hematoxylin.

45s

53.2 Wash with water for  00:05:00 .

5m

53.3 Mount the slides with fluoromount (Roth) by using a robotic coverslipper.

## 54

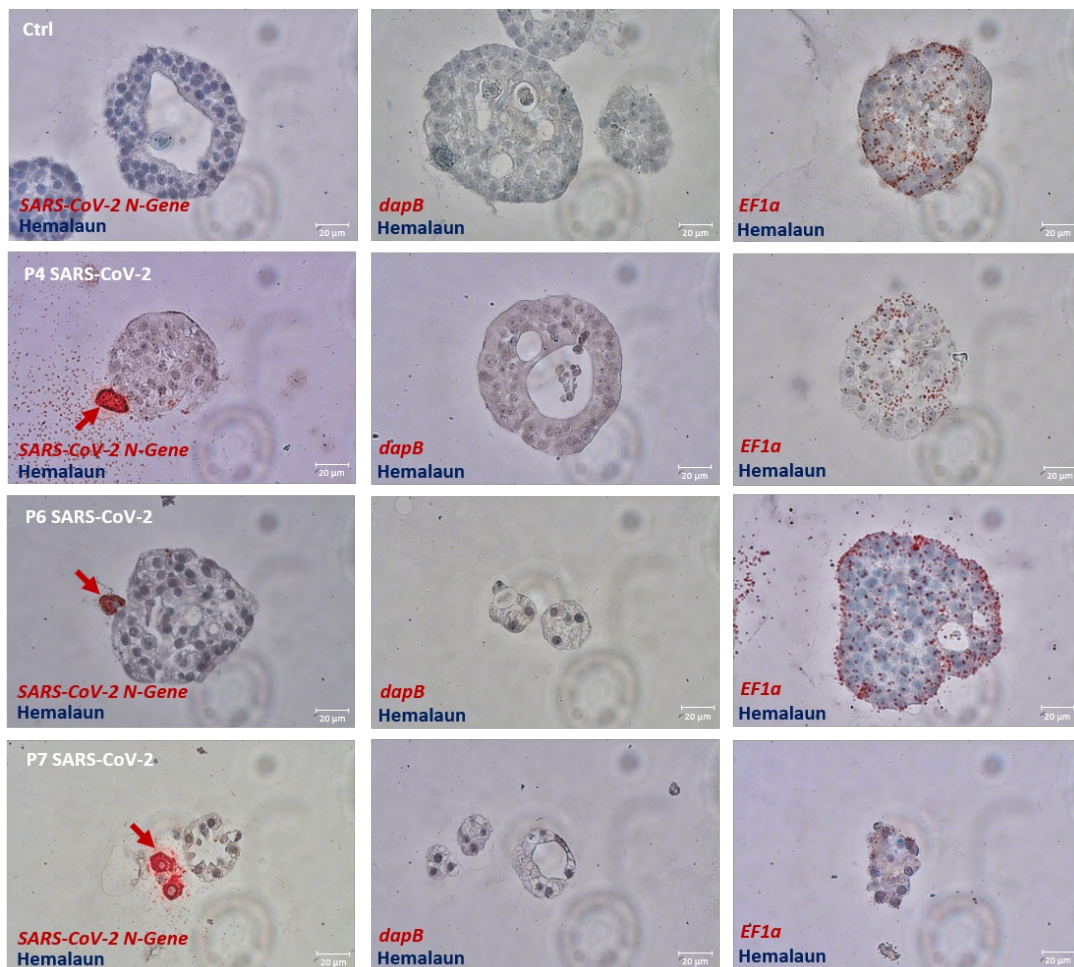

*In situ* hybridization of human alveolar-like organoids (three donors) shows SARS-CoV-2 mRNA expression (left column, red). *DapB* and *EF1a* served as negative respectively positive control. Red arrows indicate cells positive for SARS-CoV-2. Scale bars = 20 µm.

- 55 For *ACE2 in situ* hybridization proceed with the "RNAscope® Multiplex Fluorescent Reagent Kit v2 Assay":

[📄 USM-323100\\_Multiplex\\_Fluorescent\\_v2\\_User\\_Manual\\_10282019.pdf](#)

The following changes were made using the USM-323100 protocol:

Page 14, step 5: a third xylene incubation step is implemented (5 min at RT).

Page 15, target retrieval: a digital heat plate is used instead of a steamer.

Page 17: a staining cuvette is used instead of the slide holder.

After finishing the steps for "FFPE sample preparation and pretreatment", continue with chapter 4 on page 28.

Page 31: Opal is used with a dilution of 1:1500.

Exemplary results are shown at **step 41**.
